# Supplementary material
Source: PubMed Central journal article supplement (PMC4897187)
Supplement: cr201662x1.pdf [file cr201662x1.pdf]

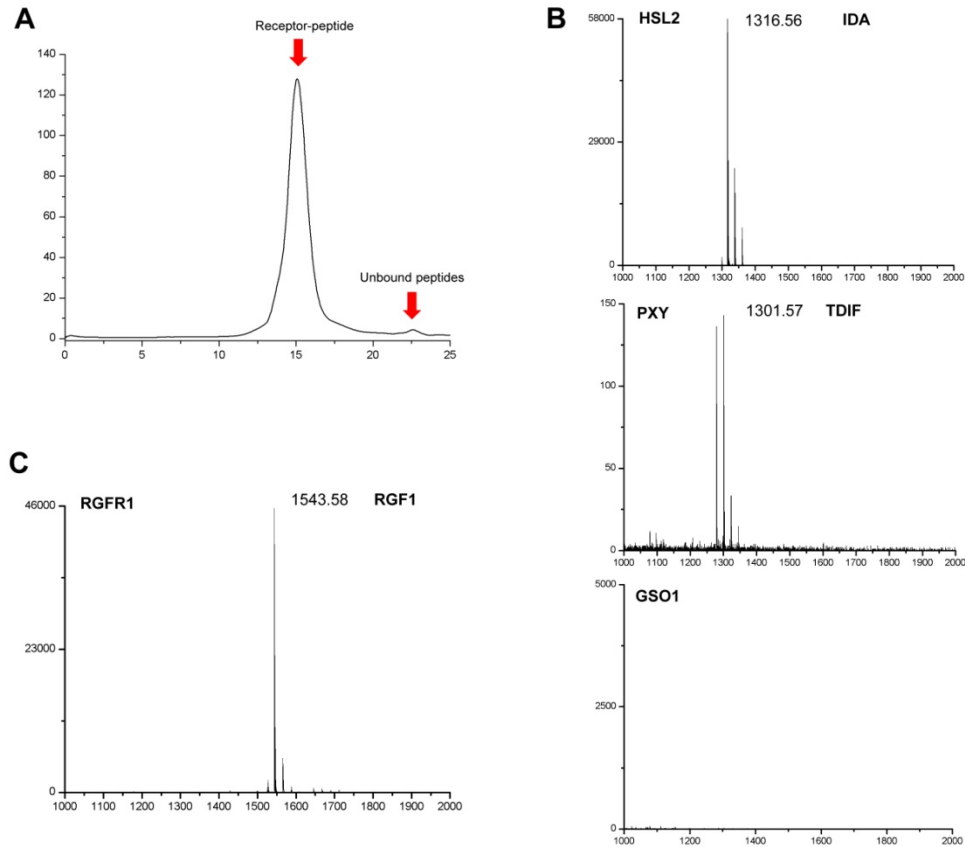

**Figure S1 Identification of the LRR-RK At4g26540 as a receptor of RGF1 by Gel-filtration and MS.**

(A) Gel-filtration chromatogram of the extracellular LRR domain protein of At4g26540 (RGFR1<sup>LRR</sup>) and a pool of peptides. The red arrows indicate the elution positions of RGFR1<sup>LRR</sup>-peptide and the unbound peptides. The vertical and horizontal axes represent UV absorbance (280 nm) and elution volume (ml) respectively. (B) MALDI-TOF MS of the peak fractions of HSL2<sup>LRR</sup>-peptides, PXY<sup>LRR</sup>-peptides and GSO1<sup>LRR</sup>-peptides. The vertical and horizontal axes represent the intensity and molecular weight of MS, respectively. (C) MALDI-TOF MS of the peak fraction of RGFR1<sup>LRR</sup>-peptide. The molecular weight of the peptide from the peak fraction (1543.58) as indicated is equivalent to the calculated weight (1623.64) of RGF1 with loss of the sulfate group (80.06).
