# Supplementary material
Source: PubMed Central journal article supplement (PMC4897187)
Supplement: cr201662x2.pdf [file cr201662x2.pdf]

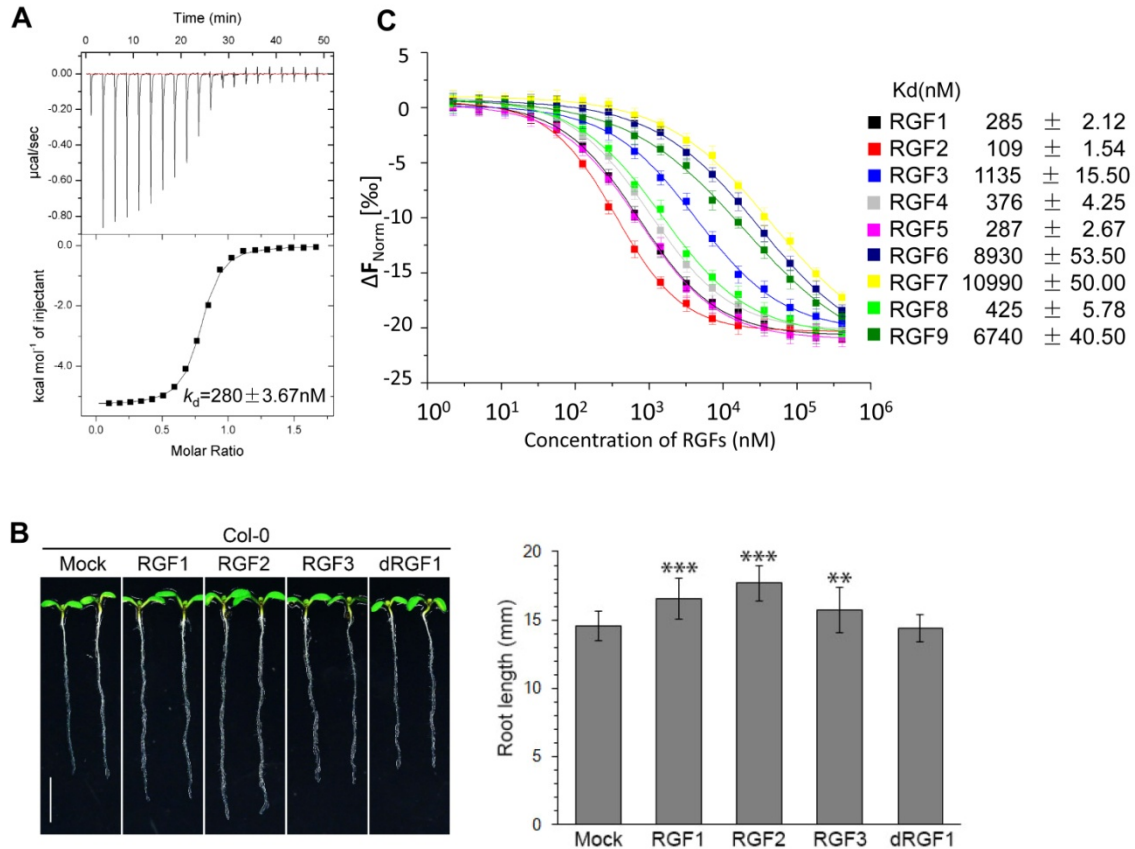

**Figure S2 Quantitative assays of RGFR1<sup>LRR</sup> interaction with RGFs.**

(A) Quantification of RGF1 binding affinity with RGFR1<sup>LRR</sup> by Isothermal Titration Calorimetry (ITC). Injections of RGF1 as indicated were added to the RGFR1<sup>LRR</sup> solution in the ITC cell. The dissociation constant ( $K_d$ ) of RGF1-RGFR1<sup>LRR</sup> is indicated. (B) In vivo activities of RGFs. Left, phenotype of 7 DAG Col-0 seedlings grown on the medium supplied with or without 0.1 nM of RGF1,2,3 and dRGF1. Scale bars, 5mm. Right, quantitative analysis of the root length of seedlings. n=25. \*\*, p<0.01, \*\*\*, p<0.001 by Student's t test. (C) Quantification of binding affinity between RGFs and RGFR1<sup>LRR</sup> by MST. Data points indicate the differences in normalized fluorescence (%) generated by RGFs binding to the RGFR1<sup>LRR</sup> protein, and curves indicate the calculated fits. Error bars represent standard error of 3 independent measurements.
