# Supplementary material
Source: PubMed Central journal article supplement (PMC4897187)
Supplement: cr201662x3.pdf [file cr201662x3.pdf]

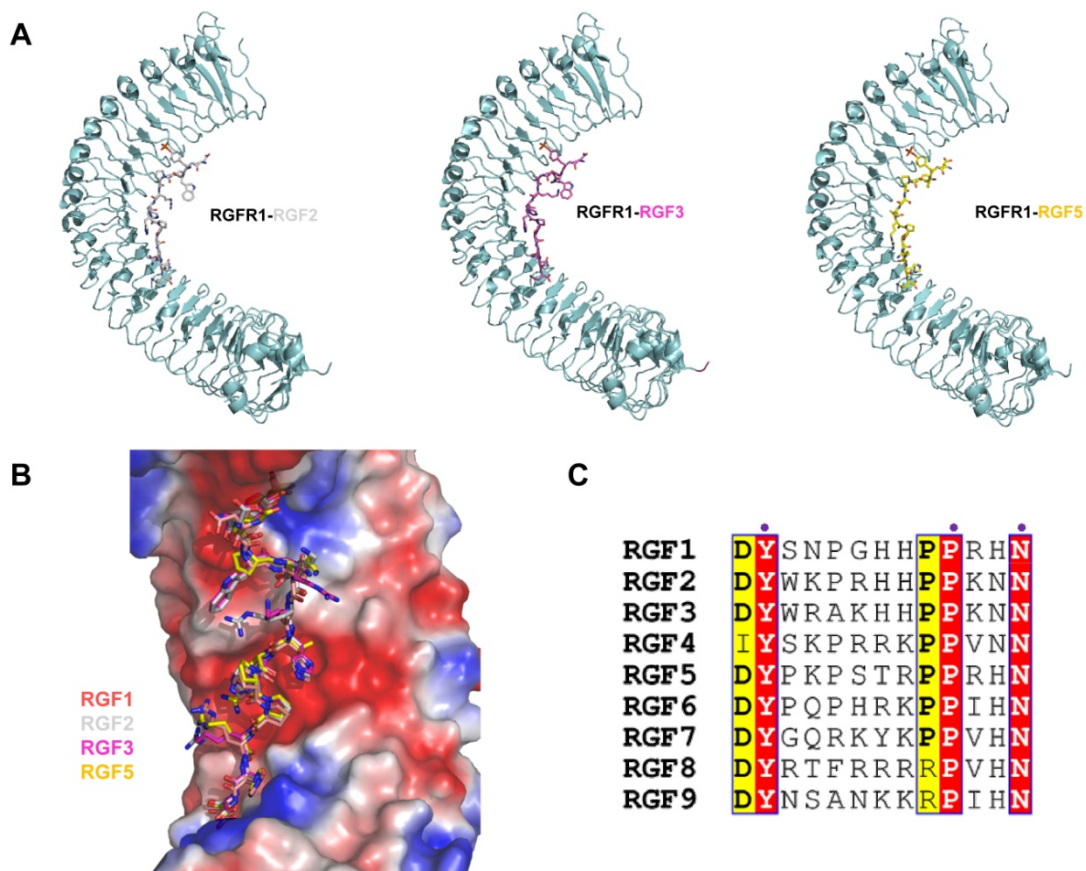

**Figure S3 Conserved recognition mechanism of RGFs by RGFR1.**

(A) Structures of RGFR1<sup>LRR</sup> in complex with RGF2 (grey), RGF3 (pink) and RGF5 (yellow). (B) Structural superposition of the RGFR1<sup>LRR</sup>-bound RGF1,2,3,5. RGFR1<sup>LRR</sup> is shown in electrostatic surface and RGFs in sticks. Residues of RGFs involved in interaction with RGFR1<sup>LRR</sup> are shown in sticks. (C) Sequence alignment of RGF1-9.
