# Supplementary material
Source: PubMed Central journal article supplement (PMC4897187)
Supplement: cr201662x4.pdf [file cr201662x4.pdf]

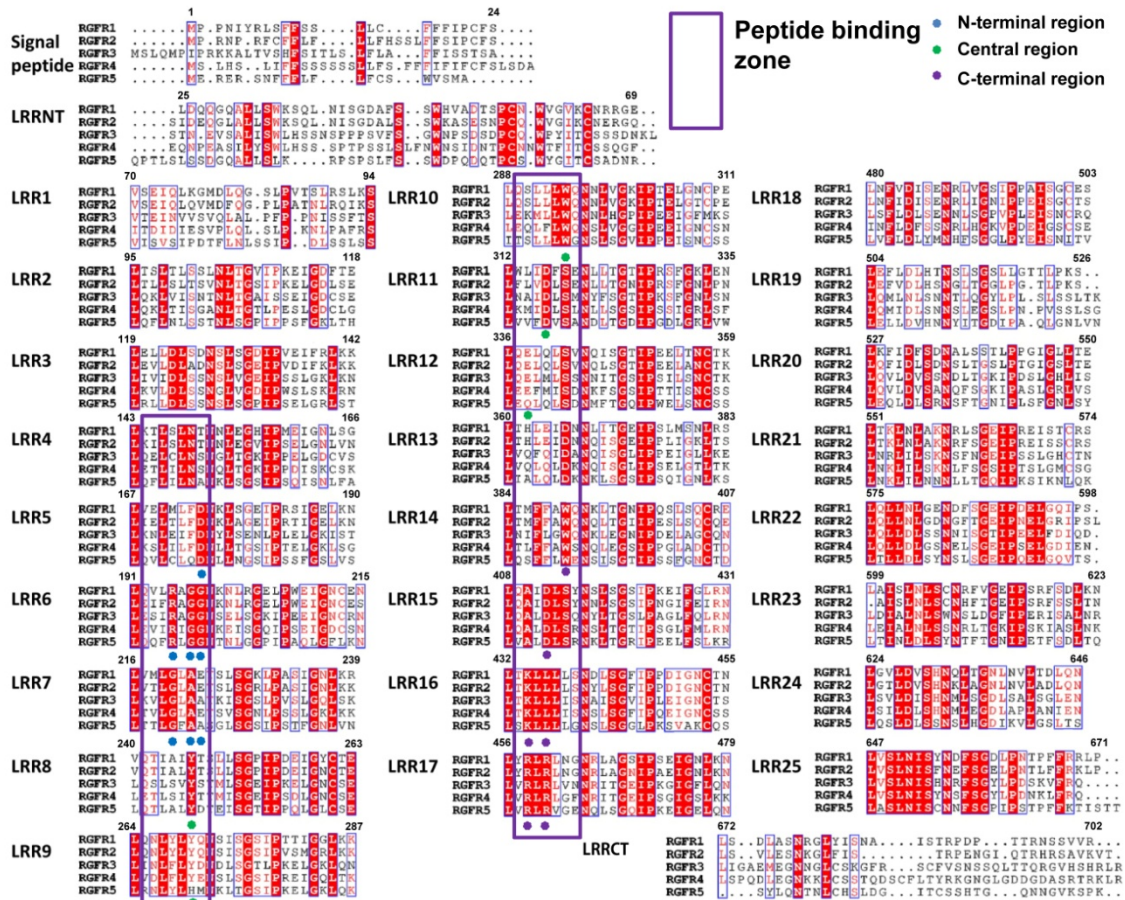

**Figure S4** Sequence alignment the extracellular LRR domains of RGF1-5.

Conserved and similar residues are boxed with red ground and red font, respectively. Residues involved in interaction with the N-terminal, central and C-terminal part of are indicated with blue, green and purple dots at the bottom, respectively. The RGF-binding region of RGF1 is indicated.
