# Supplementary material
Source: PubMed Central journal article supplement (PMC4897187)
Supplement: cr201662x5.pdf [file cr201662x5.pdf]

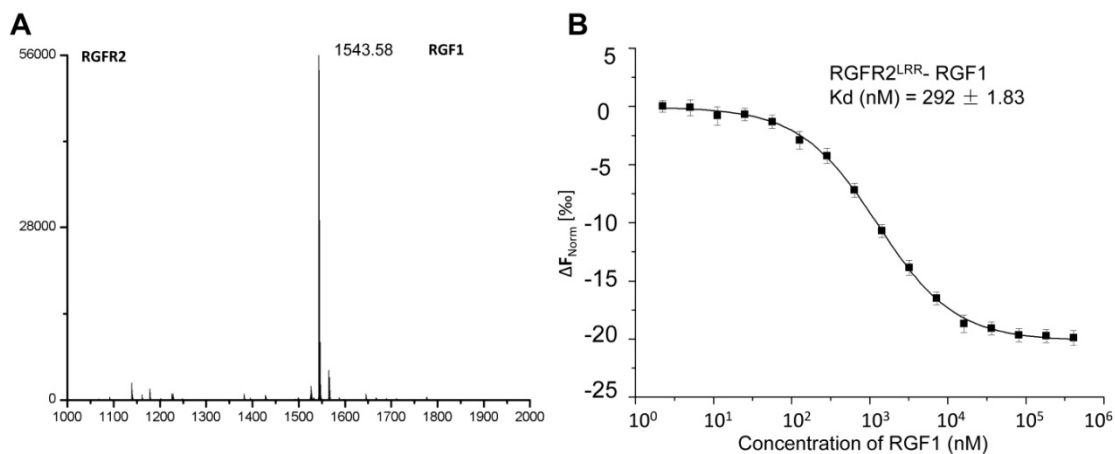

**Figure S5 RGF1 interacts with RGFR2<sup>LRR</sup> in vitro.**

**(A)** MALDI-TOF MS of the peak fraction RGF1-RGFR2<sup>LRR</sup>. The RGFR2<sup>LRR</sup> protein and peptide mixture containing RGF1 were incubated and subjected to gel-filtration. The peak fraction was assayed by MS. **(B)** Quantification of the binding affinity between RGF1 and RGFR2<sup>LRR</sup> by MST.
