# Supplementary material
Source: PubMed Central journal article supplement (PMC4897187)
Supplement: cr201662x6.pdf [file cr201662x6.pdf]

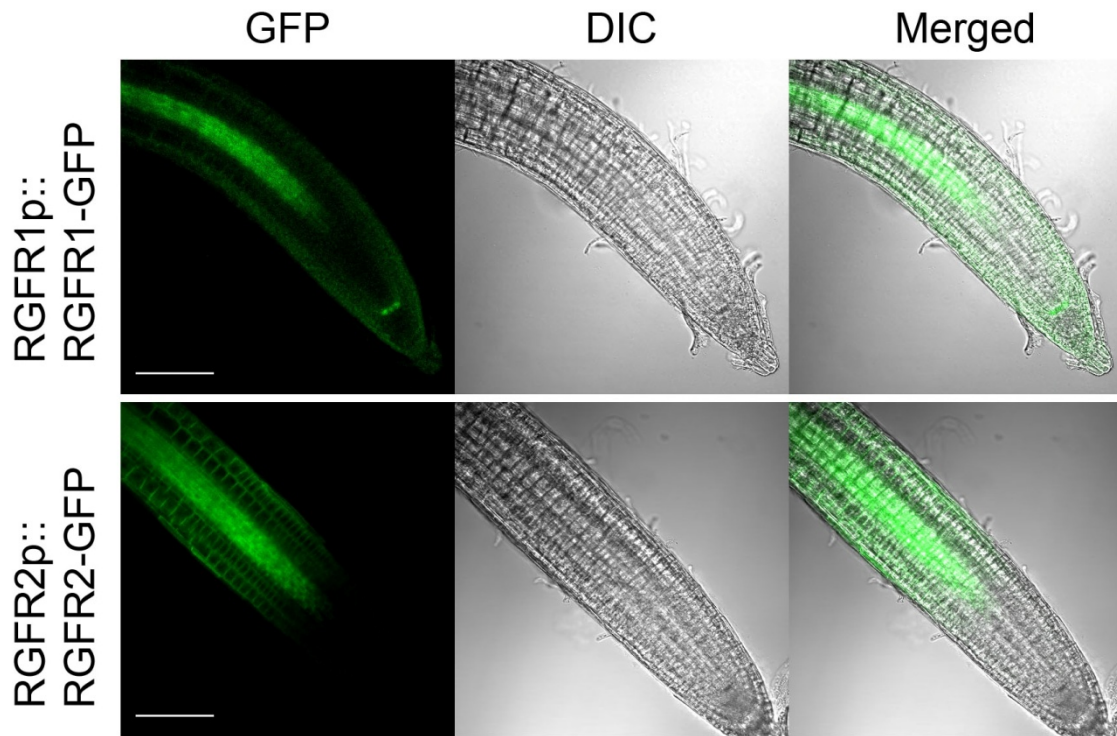

**Figure S6 RGFR1/2 expression patterns in root.**

The expression pattern of RGFR1p::RGFR1-GFP and RGFR2p::RGFR2-GFP in root tips.

Scale bars, 50  $\mu$ m.
