# Supplementary material
Source: PubMed Central journal article supplement (PMC4897187)
Supplement: cr201662x7.pdf [file cr201662x7.pdf]

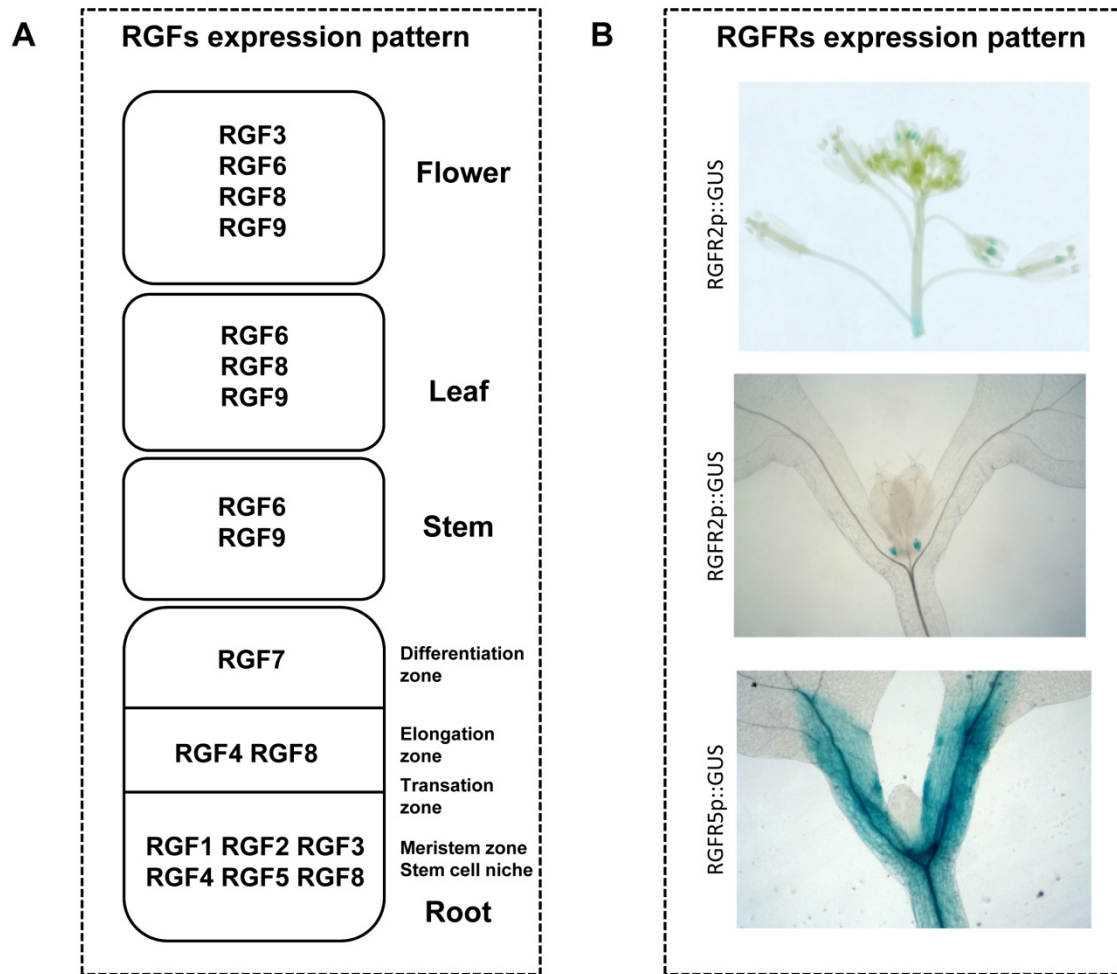

**Figure S7 Expression patterns of RGFs and RGFRs.**

(A) The summary of RGFs expression patterns from published data (15). (B) The expression pattern of RGFR2p::GUS in inflorescences of 4 week-old plant (upper), leaf stipules (middle) and RGFR5p::GUS in hypocotyl (bottom).
