# Supplementary material
Source: PubMed Central journal article supplement (PMC4897187)
Supplement: cr201662x8.pdf [file cr201662x8.pdf]

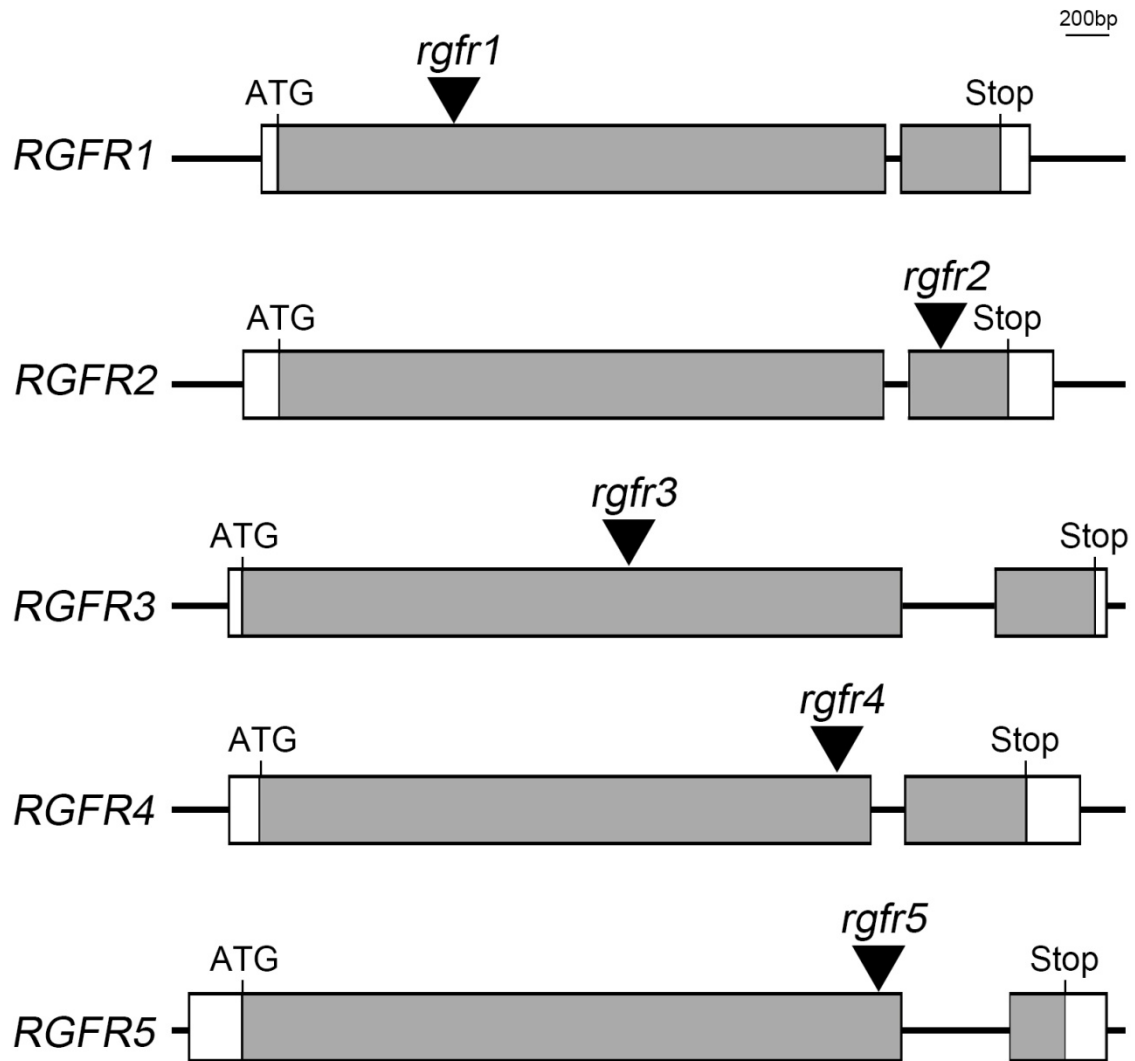

**Figure S8 Schematic map of the T-DNA insertion mutants of *rgfr1*, *rgfr2*, *rgfr3*, *rgfr4* and *rgfr5*.**

In *rgfr1* (Salk\_053167), a single T-DNA was inserted in the first exon. In *rgfr2* (Salk\_057829), a single T-DNA was inserted in the second exon. In *rgfr3* (Salk\_038309), a single T-DNA was inserted in the first exon. In *rgfr4* (Salk\_040393), a single T-DNA was inserted in the first exon. In *rgfr5* (Salk\_014726), a single T-DNA was inserted in the first exon. Gray squares indicate the exons. White squares indicate the untranslated regions.
