# Supplementary material
Source: PubMed Central journal article supplement (PMC4897187)
Supplement: cr201662x9.pdf [file cr201662x9.pdf]

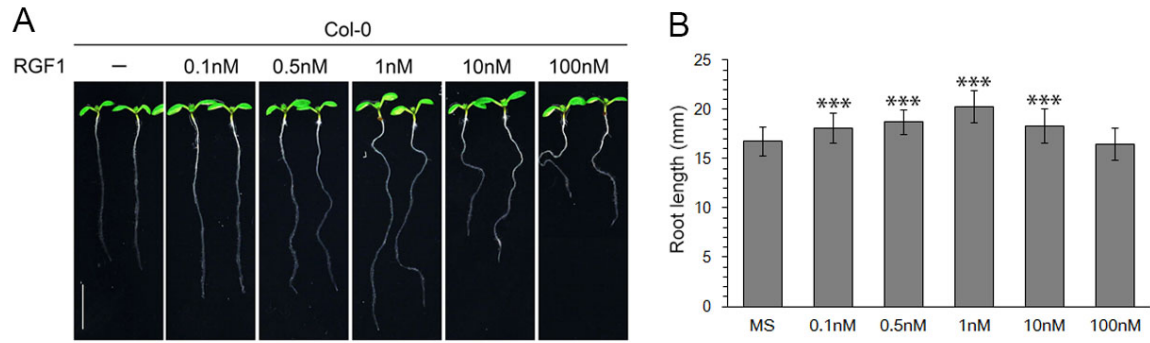

**Figure S9 Dose-dependent RGF1 response pattern of Col-0.**

(A) Phenotype of 7 DAG Col-0 seedlings grown on the medium supplied with different concentration of RGF1. Scale bars, 5 mm. (B) Quantification of the root length of seedlings in (A). n=25, \*\*\*, p<0.001 by Student's t test.
