# Supplementary material
Source: PubMed Central journal article supplement (PMC4897187)
Supplement: cr201662x10.pdf [file cr201662x10.pdf]

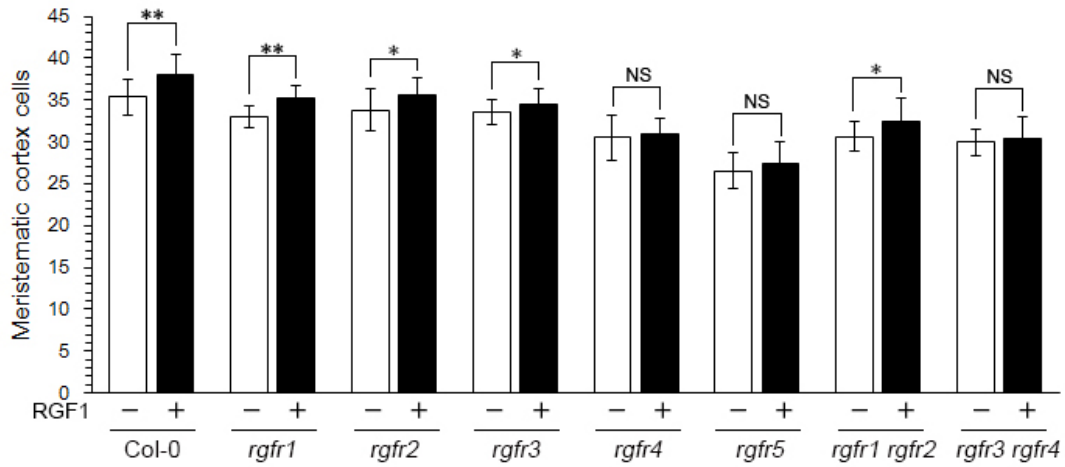

**Figure S10 RGF1 induced meristem response in *rgfr* mutants.**

RGF1 response of Col-0 and *rgfr* mutants in meristem. Quantification of meristematic cortex cell number of 5 DAG Col-0 and mutants seedlings grown on the medium supplied with 1nM RGF1. n=25. \*, p<0.05, \*\*, p<0.01, \*\*\*, p<0.001 by Student's t test. NS indicates nonsignificant.
