# Supplementary material
Source: PubMed Central journal article supplement (PMC4897187)
Supplement: cr201662x11.pdf [file cr201662x11.pdf]

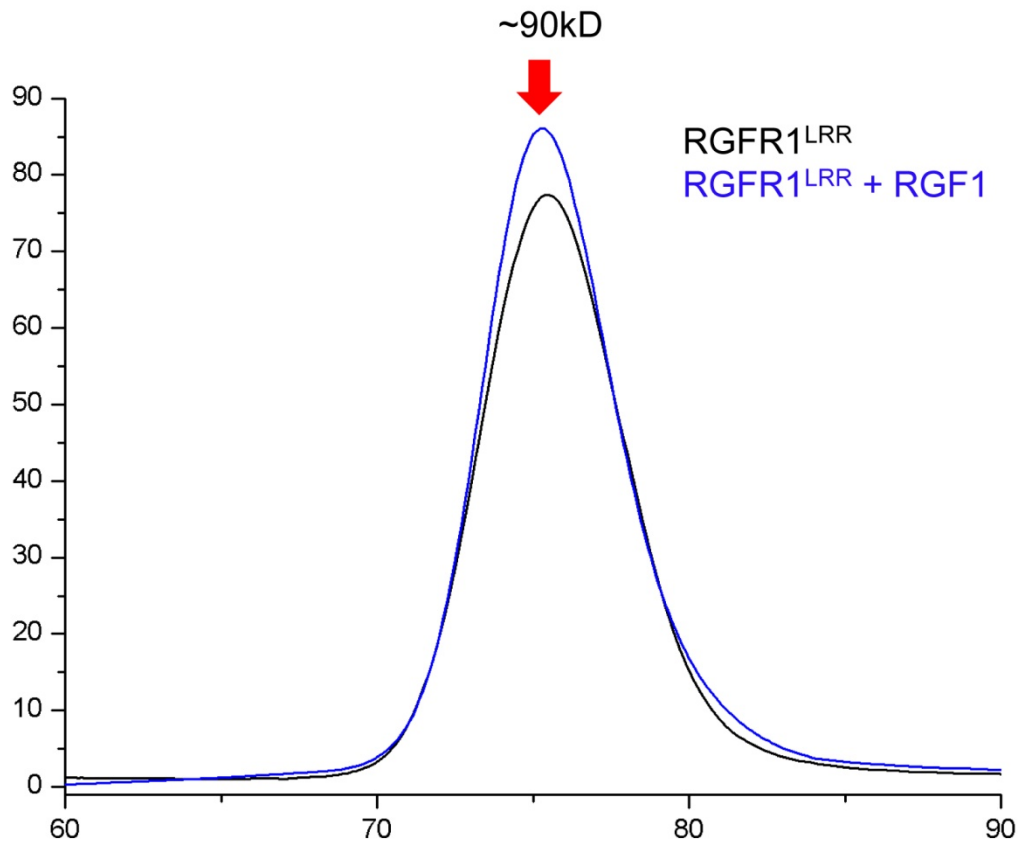

**Figure S11 RGF1 binding induces no oligomerization of RGFR1<sup>LRR</sup> in vitro.**

Superposition of the gel filtration chromatograms of the RGFR1<sup>LRR</sup> and RGF1-RGFR1<sup>LRR</sup> proteins. The red arrow indicates the elution positions of RGFR1<sup>LRR</sup> and RGF1-RGFR1<sup>LRR</sup>.
