# Supplementary material
Source: PubMed Central journal article supplement (PMC4897187)
Supplement: cr201662x12.pdf [file cr201662x12.pdf]

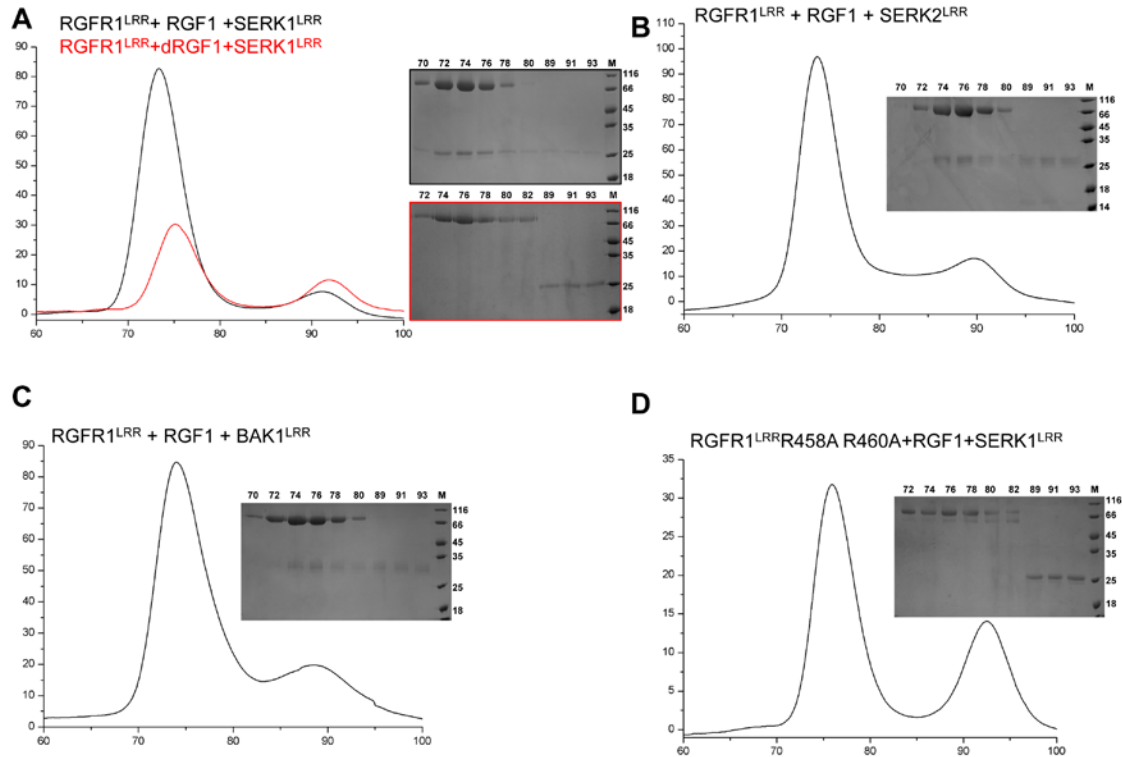

**Figure S12 RGF1 induces RGFR1<sup>LRR</sup>-SERKs heterodimerization.**

(A) RGF1 induces RGFR1<sup>LRR</sup>-SERK1<sup>LRR</sup> heterodimerization in solution. Left, the gel filtration chromatograms of the mixed RGFR1<sup>LRR</sup> and SERK1<sup>LRR</sup> proteins in the presence of RGF1 (black) or dRGF1 (red). The vertical and horizontal axes represent UV absorbance (280 nm) and elution volume (ml) respectively. Right, Coomassie blue staining of the peak fractions shown on the left following SDS-PAGE. M, molecular weight ladder (kDa). (B) RGF1 induces RGFR1<sup>LRR</sup>-SERK2<sup>LRR</sup> heterodimerization in solution. The assay was performed as described in (A). (C) RGF1 induces RGFR1<sup>LRR</sup>-BAK1<sup>LRR</sup> heterodimerization. The assay was performed as described in (A). (D) RGFR1<sup>LRR</sup> containing RxR motif mutant proteins is unable to induce RGFR1<sup>LRR</sup>-SERK1<sup>LRR</sup> heterodimerization. The assay was performed as described in (A).
