# Supplementary material
Source: PubMed Central journal article supplement (PMC4897187)
Supplement: cr201662x13.pdf [file cr201662x13.pdf]

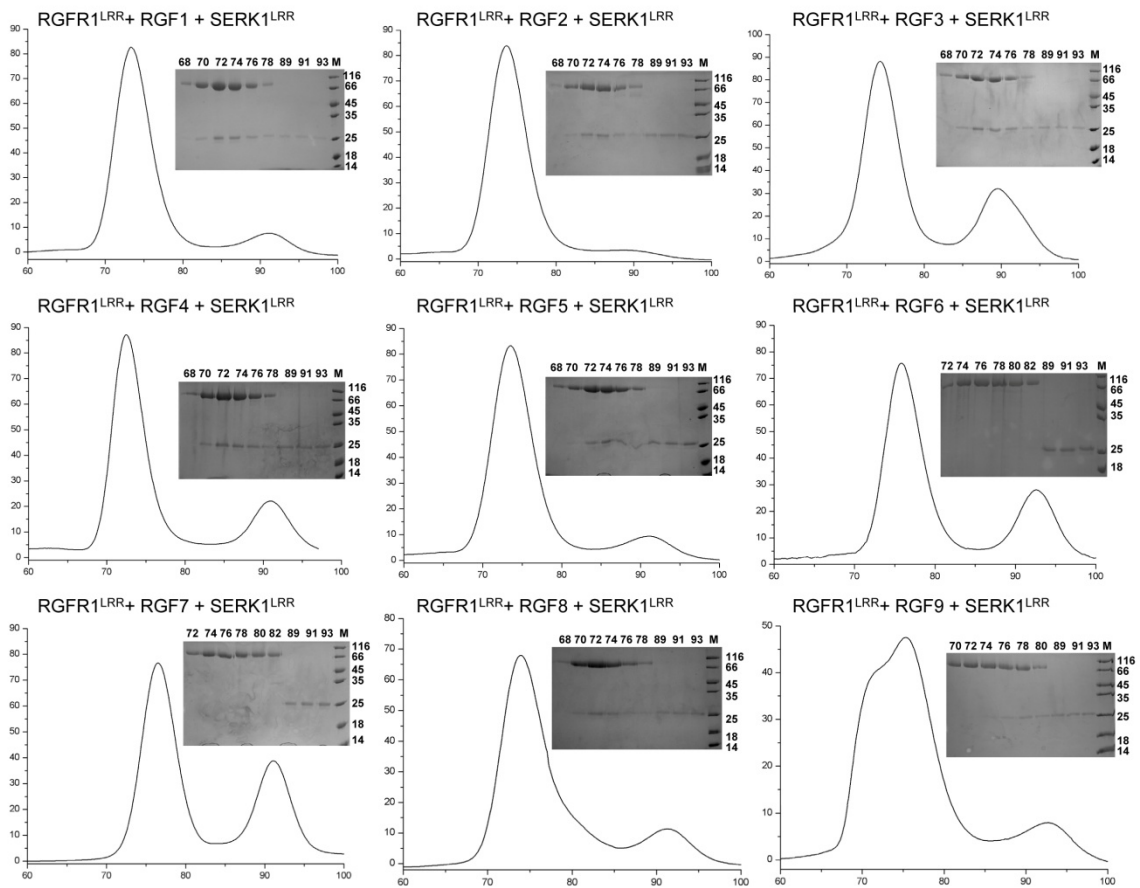

**Figure S13 RGF1-5, 8 but not RGF6, 7, 9 induce RGFR1<sup>LRR</sup>-SERK1<sup>LRR</sup> heterodimerization in vitro.**

The purified RGFR1<sup>LRR</sup> and SERK1<sup>LRR</sup> proteins were individually mixed with RGFs as indicated and then subjected to gel filtration. M, molecular weight ladder (kDa).
