# Supplementary material
Source: PubMed Central journal article supplement (PMC4897187)
Supplement: cr201662x14.pdf [file cr201662x14.pdf]

**Solanum lycopersicum (tomato)**

```
sly_101264597 L L R I R M G E N F L N G S I P K G L L S L P K
sly_101248733 L N R I R M G E N Y L N G S I P K G L L S L P H
sly_101267452 L V R L R L G Q N Y L N G S I P N G F I Y M P E
sly_101248913 L S R V R M G Q N Y L S G S I P T G F L Y L P E
sly_101249348 L V R V R I Q N N L L S G M I P V G F G T L P M
sly_101246467 L V R V R M Q N N L L S G T I P A G F G K L G K
sly_101256593 L S R L R V Q D N K L N G S I P S G F G F L P N
sly_101263386 L F R F R I Q N N R L N G S I P L G F G V L P N
sly_101266413 L T R I R V R K N Y L N G T I P A G F F K L P A
sly_101253604 L L R I R I F R S N K L F G E V P T D F W S L P H
```

**Oryza sativa japonica (rice)**

```
osa_4331599 L V R V R F H N N R L N G T V P L G L G R L P R
osa_4328049 L V R V R V H G N R L N G T I P V G F G K L P L
osa_4342080 L T R V R I A K N F L T G P V P A G L F N L P Q
osa_9266544 L T R V R I A R N Y L T G P L P R G F L Y L P A
osa_4350138 L O R F R I N K N K L T G S L P A G L W G L P A
osa_4326367 L R R V R I S N N R L D G D V P A A V W G L P H
osa_4345424 L T R V R I P N N R L S G A V P P D M W G L P H
osa_4334273 L S R V R I G E N Y L N G S I P K G L F E L P K
osa_4342345 L T R V R I G D N Y L N G S I P E G L F E L P N
osa_4341409 L V R L R I G E N Q L A G E I P R E I G K L P N
```

**Zea mays (maize)**

```
zma_103652818 L O R F R I N K N R F T G D L P E G L W G L P A
zma_103635022 L R R V R I S S N R I A G D V P D A V W G L P H
zma_103643336 L T R V R I P N N R L S G P V P Q G L W S L P H
zma_103639559 L V R V R F H N N R L N G T V P A G L G R L P R
zma_103631713 L V R V R F H N N R L N G T V P A G L G G L P R
zma_103626517 L V R V R M Q S N R L T G T I P V G F G K L P S
zma_103644083 L S R V R I G E N Y L N G S I P K G L F E L P K
zma_103652819 L T R V R I G Q N Y L N G S I P A G L L Y L P R
zma_100279272 L T R I R I G E N F L N G T I P A K L F T L P N
zma_103626458 L T R V R I L G K N F L T G P V P A G L F D L P Q
```

**Glycine max (soybean)**

```
gmx_547592 L N R I R M G E N F L N G S I P K G L F G L P K
gmx_100499646 L N R I R M G E N F L N G S I P K G L F G L P K
gmx_548032 L T R I R M G E N F L N G S I P K G L F G L P K
gmx_547593 L T R I R M G E N F L N G S I P R G L F G L P K
gmx_100776936 L S R V R I G T N R L S G E V P A G M W G L P H
gmx_100819887 L T R V R I G F N R L S G E V P A G I W G L P H
gmx_100777902 L O R V R I G Q N Y L T G S I P N G F L Y L P E
gmx_100816158 L O R V R I G Q N Y L T G S I P N G F L Y L P E
gmx_100803075 L O R V R I G Q N Y L T G P L P H E F L Y L P E
gmx_100815103 L O R V R I G Q N Y L T G P L P H E F L Y L P E
```

**Figure S14 The RxR motif are conserved in different plant species.**

Sequence alignment of LRR-RLKs containing the RxR motif from tomato, rice, maize and soybean.
