# Supplementary material
Source: PubMed Central journal article supplement (PMC4897187)
Supplement: cr201662x15.pdf [file cr201662x15.pdf]

**Table S1 Peptide list.**

| Name  | Sequence (from N terminus to C terminus)     |
|-------|----------------------------------------------|
| CLV3  | RTV(Hyp)SG(Hyp)DPLHH                         |
| CLE3  | RLSPGG(Hyp)DPRHH                             |
| CLE6  | RVSPGG(Hyp)DPQHH                             |
| CLE8  | RRVPTG(Hyp)NPLHH                             |
| CLE9  | RLV(Hyp)SG(Hyp)NPLHN                         |
| CLE11 | RVVPSG(Hyp)NPLHH                             |
| CLE12 | RRVPSG(Hyp)NPLHH                             |
| CLE14 | RLVPKG(Hyp)NPLHN                             |
| CLE16 | RLVHTG(Hyp)NPLHN                             |
| CLE18 | RQIPTG(Hyp)DPLHN                             |
| CLE19 | RVIPTG(Hyp)NPLHN                             |
| CLE20 | RKVKTGSNPLHN                                 |
| CLE25 | RKVPNG(Hyp)DPIHN                             |
| CLE40 | RQVPTGSDPLHH                                 |
| TDTF  | HEV(Hyp)SG(Hyp)NPISN                         |
| CLE43 | RRIPSS(Hyp)DRLHN                             |
| CLE45 | RRVRRGSDPIHN                                 |
| CLE46 | HKHPSG(Hyp)NPTGN                             |
| PIP1  | RLASG(Hyp)SPRGPGH                            |
| CEP1  | DFR(Hyp)TNPGNS (Hyp)GVGH                     |
| IDA   | PIPPSAS(Hyp)KKRHN                            |
| PSK   | Y(SO <sub>3</sub> H)I Y(SO <sub>3</sub> H)TQ |
| RGF1  | DY(SO <sub>3</sub> H)SNPGHHP(Hyp)RHN         |

Peptides for peptide mixture.

| Name  | Sequence (from N terminus to C terminus) |
|-------|------------------------------------------|
| RGF1  | DY(SO <sub>3</sub> H)SNPGHHP(Hyp)RHN     |
| RGF2  | DY(SO <sub>3</sub> H)WKPRHHP(Hyp)KNN     |
| RGF3  | DY(SO <sub>3</sub> H)WRAKHHP(Hyp)KNN     |
| RGF4  | IY(SO <sub>3</sub> H)SKPRRKP(Hyp)VNN     |
| RGF5  | DY(SO <sub>3</sub> H)PKPSTRP(Hyp)RHN     |
| RGF6  | DY(SO <sub>3</sub> H)PQPHRKP(Hyp)IHN     |
| RGF7  | DY(SO <sub>3</sub> H)GQRKYKP(Hyp)VHN     |
| RGF8  | DY(SO <sub>3</sub> H)RTFRRRR(Hyp)VHN     |
| RGF9  | DY(SO <sub>3</sub> H)NSANKKRPIHN         |
| dRGF1 | DYSNPGHHP(Hyp)RHN                        |

RGF peptides for biochemical and genetic assays.
