# Supplementary material
Source: PubMed Central journal article supplement (PMC4897187)
Supplement: cr201662x16.pdf [file cr201662x16.pdf]

**Table S2 Summary of crystallography analysis.**

| <b>Data set</b>                  | RGF1-RGFR1 <sup>LRR</sup> | RGF2-RGFR1 <sup>LRR</sup> | RGF3-RGFR1 <sup>LRR</sup> | RGF5-RGFR1 <sup>LRR</sup> |
|----------------------------------|---------------------------|---------------------------|---------------------------|---------------------------|
| Wavelength (Å)                   | 1.000                     | 1.000                     | 1.000                     | 1.000                     |
| Resolution (Å)                   | 99.0-2.6 (2.64-2.6)       | 99.0-2.55(2.59-2.55)      | 99.0-2.6 (2.64-2.6)       | 99.0-2.86 (2.91-2.86)     |
| Space group                      | R3                        | R3                        | R3                        | R3                        |
| a, b, c (Å)                      | 182.3,182.3, 87.4         | 181.0,181.0, 88.0         | 183.5,183.5, 87.6         | 179.2,179.2, 88.4         |
| $\alpha, \beta, \gamma$ (°)      | 90.0, 90.0, 120.0         | 90.0, 90.0, 120.0         | 90.0, 90.0, 120.0         | 90.0, 90.0, 120.0         |
| Unique reflections               | 33,085(1,666)             | 33,781(1,773)             | 33,847(1,444)             | 22,741(1,215)             |
| Completeness                     | 98.8 (100.0)              | 96.9% (100.0%)            | 99.1%(87.8%)              | 93.0%(100.0%)             |
| Rsym (%)                         | 8.6(52.8)                 | 7.1(44.8)                 | 8.8(58.3)                 | 8.4(40.5)                 |
| redundancy                       | 4.7(4.7)                  | 5.4(5.7)                  | 5.2(3.9)                  | 5.3(5.7)                  |
| $I/\delta$                       | 19.5(4.5)                 | 14.5(4.7)                 | 31.8(2.7)                 | 13.4(5.2)                 |
| <b>Statistics for refinement</b> |                           |                           |                           |                           |
| Resolution (Å)                   | 99.0-2.6 (2.67-2.6)       | 99.0-2.55                 | 99.0-2.6                  | 99.0-2.86                 |
|                                  | 33,048(2,752)             | (2.63-2.55)               | (2.67-2.6)                | (2.99-2.86)               |
| No. of RFs                       |                           | 33,751(2,931)             | 33,780(2,629)             | 22,723(3,040)             |
| Completeness                     | 98.7%                     | 97.1%                     | 98.9%                     | 93.0%                     |
| Rwork/Rfree                      | 19.1 (23.3)/              | 21.9(26.2)/               | 21.7(25.2)/               | 22.9(29.4)/               |
| (%)                              | 24.7(35.1)                | 24.2(26.3)                | 26.0(32.7)                | 23.6(32.5)                |
| R.m.s.d                          |                           |                           |                           |                           |
| Bond (degree)                    | 1.421                     | 1.485                     | 1.477                     | 1.485                     |
| length (Å)                       | 0.008                     | 0.008                     | 0.009                     | 0.008                     |
| Ramachandran                     | Favored: 96.51%           | Favored: 95.56%           | Favored: 96.2%            | Favored: 94.47%           |
| Plot                             | Allowed: 3.33%            | Allowed: 4.44%            | Allowed: 3.8%             | Allowed: 5.21%            |
|                                  | Outliers: 0.16%           | Outliers: 0.0%            | Outliers: 0.0%            | Outliers: 0.32%           |

RF: Reflection

$R_{\text{sym}} = \frac{\sum_h \sum_i |I_{h,i} - I_h|}{\sum_h \sum_i I_{h,i}}$ , where  $I_h$  is the mean intensity of the  $i$  observations of symmetry related reflections of  $h$ .

$R = \frac{\sum |F_{\text{obs}} - F_{\text{calc}}|}{\sum F_{\text{obs}}}$ , where  $F_{\text{obs}} = F_p$ , and  $F_{\text{calc}}$  is the calculated protein structure factor from the atomic model.

R.m.s.d. in bond lengths and angles are the deviations from ideal values.
