# Supplementary material
Source: PubMed Central journal article supplement (PMC4897187)
Supplement: cr201662x17.pdf [file cr201662x17.pdf]

**Table S3 Primer list.**

| Name                | Primer (from 5' to 3')                                          |
|---------------------|-----------------------------------------------------------------|
| HindIII-RGFR1pro-F  | gcaagcttggtgaaatttcgattcgttttacgtgtag                           |
| RGFR1pro-BamHI-R    | gcggatcccggagaagacgaagatgaggaagaag                              |
| HindIII- RGFR2pro-F | gcaagcttcctctttatggaccatattcattaactctccccac                     |
| RGFR2pro-Sall-R     | gcgtcgactggtgaagagggagaggaagaagaagaagtg                         |
| XbaI-RGFR3pro-F     | ctagtctagaatacatcatcaaagaatatcattacaga                          |
| RGFR3pro-BamHI-R    | cgcgatccagagttttttcttgcatttggtctc                               |
| XbaI-RGFR4pro-F     | ctagtctagattattacagtaaaacatgaccaaagt                            |
| RGFR4pro-BamHI-R    | cgcgatccttgctcaaaatacgaagaagatt                                 |
| HindIII-RGFR5pro-F  | ccaagcttaccatttaattatattttgaatatcgc                             |
| RGFR5-BamHI-R       | cgcgatccggaatctctgtgaagaagacgaaggtg                             |
| SacI-SERK1- F       | gcgagctcatggagtcgagttatgtggtg                                   |
| SERK1-HA-KpnI-R     | gcggtacctcaggcgtagtcaggcacgtcgttaaggataaggacatcgaagaaaatatctag  |
| SacI-SERK2- F       | gcgagctcatgggagaaaaaagtttgaag                                   |
| SERK2-HA-KpnI-R     | gcggtacctcaggcgtagtcaggcacgtcgttaaggataaggaacatcaaagaagaattc    |
| SacI-BAK1- F        | gcgagctcatggaacgaagattaatgatc                                   |
| BAK1-HA-KpnI-R      | gcggtacctcaggcgtagtcaggcacgtcgttaaggatatggtacatcaaagaagtggtcctg |
